# Supplementary material for: Local and Global Resting State Activity in the Noradrenergic and Dopaminergic Pathway Modulated by Reboxetine and Amisulpride in Healthy Subjects
Source: PubMed Central journal article supplement (PMC4772816; doi:10.1093/ijnp/pyv080), 2015-07-25
Supplement: supplementary_tables.pdf [file supplementary_tables.pdf]

## Supplementary Tables

### Table S1:

|                               | <b>k</b> | <b>z</b> | <b>p-unc.</b> | <b>x,y,z</b> |
|-------------------------------|----------|----------|---------------|--------------|
| <b>Locus coeruleus/tectum</b> | 460      | 4,952    | < 0,000001    | [6;-30;-21]  |
|                               | *        | 4,566    | < 0,00001     | [-6;-39;-24] |
| <b>cerebellum</b>             | *        | 4,201    | < 0,0001      | [9;-51;-15]  |
| <b>putamen left</b>           | 160      | 4,565    | < 0,00001     | [-30;-6;-9]  |
|                               | *        | 4,024    | < 0,0001      | [-27;-9;6]   |
|                               | *        | 3,690    | < 0,001       | [-21;-12;18] |
| <b>pulvinar right</b>         | 17       | 3,772    | < 0,0001      | [24;-24;18]  |
| <b>hypothalamus</b>           | 17       | 3,699    | < 0,001       | [3;-3;-9]    |
| <b>sgACC</b>                  | 10       | 3,587    | < 0,001       | [0;30;0]     |
| <b>anterior insula right</b>  | 15       | 3,377    | < 0,001       | [48;9;-15]   |
|                               | *        | 3,355    | < 0,001       | [39;18;-21]  |

Clusters showing a main effect of drug on the frequency amplitude of low frequency fluctuations (fALFF). All clusters are reported at  $p < 0.001$ ,  $k = 10$ . For the interest of the reader, exact p-values are reported. Regions marked with (\*) are part of the previous cluster.

## Table S2:

| target region                            | ANOVA-f-test |     |               | AMS > PLA |    |               | REB > PLA |     |              | REB < PLA |    |               |
|------------------------------------------|--------------|-----|---------------|-----------|----|---------------|-----------|-----|--------------|-----------|----|---------------|
|                                          | z            | NV  | peak          | z         | NV | peak          | z         | NV  | peak         | z         | NV | peak          |
| <b>SUBCORTICAL REGIONS</b>               |              |     |               |           |    |               |           |     |              |           |    |               |
| amygdala right                           | 5,005        | a   | [33;3;-15]    | 4,0987    | a  | [33;3;-18]    |           |     |              |           |    |               |
| hippocampus left                         |              |     |               | 3,505     | 23 | [-30;-27;-18] |           |     |              |           |    |               |
| hippocampus right                        |              |     |               | 3,764     | a  | [21;-9;-12]   | 4,042     | 11  | [27;-9;-15]  |           |    |               |
| medial and dorsal thalamus left          | 5,667        | 106 | [-12;-18;12]  |           |    |               | 6,001     | 265 | [-12;-18;12] |           |    |               |
| medial and dorsal thalamus right         | 4,466        | 57  | [15;-18;6]    |           |    |               | 4,912     | a   | [15;-18;6]   |           |    |               |
|                                          | 3,194        | a   | [6;-9;12]     |           |    |               |           |     |              |           |    |               |
| putamen left                             |              |     |               | 3,924     | 45 | [-30;0;-6]    |           |     |              |           |    |               |
|                                          |              |     |               | 3,545     | a  | [-27;18;-9]   |           |     |              |           |    |               |
|                                          |              |     |               | 3,548     | 11 | [-24;-21;6]   |           |     |              |           |    |               |
| putamen right                            | 4,594        | 62  | [33;-3;0]     | 4,753     | 75 | [33;-3;0]     |           |     |              |           |    |               |
| <b>CORTICAL REGIONS</b>                  |              |     |               |           |    |               |           |     |              |           |    |               |
| dorsal anterior cingulate cortex right   |              |     |               | 3,373     | 13 | [9;48;9]      |           |     |              |           |    |               |
| medial occipital cortex left             |              |     |               |           |    |               |           |     |              | 3,285     | 18 | [-12;-66;0]   |
| lateral occipital cortex left            |              |     |               | 3,654     | 15 | [-36;-54;18]  |           |     |              |           |    |               |
| lateral occipital cortex right           | 3,63         | 10  | [48;-57;3]    |           |    |               | 3,249     | 10  | [60;-42;-18] | 4,182     | 40 | [48;-57;3]    |
| lateral orbitofrontal cortex left        |              |     |               |           |    |               | 3,786     | 11  | [-27;69;9]   |           |    |               |
| lateral orbitofrontal cortex right       | 3,605        | 18  | [39;57;15]    |           |    |               | 4,075     | 39  | [39;57;15]   |           |    |               |
| lateral temporal cortex right            | 4,235        | 24  | [48;12;-24]   |           |    |               |           |     |              | 4,013     | 26 | [54;9;-18]    |
|                                          | 3,74         | a   | [54;9;-18]    |           |    |               |           |     |              |           |    |               |
| medial insula right                      |              |     |               |           |    |               |           |     |              | 4,054     | 11 | [-30;6;15]    |
| medial orbitofrontal cortex left         |              |     |               |           |    |               | 3,668     | 14  | [-9;69;18]   |           |    |               |
| posterior cingulate cortex left          | 3,634        | 16  | [-3;-45;15]   | 3,659     | 30 | [-6;-45;15]   | 4,038     | 44  | [-3;-45;15]  |           |    |               |
|                                          |              |     |               | 3,4944    | a  | [-3;-33;21]   |           |     |              |           |    |               |
| posterior insula left                    |              |     |               |           |    |               | 4,144     | 20  | [-33;-30;9]  |           |    |               |
| precuneus right                          |              |     |               |           |    |               |           |     |              | 3,613     | 13 | [21;-54;3]    |
| pregenual anterior cingulate cortex left |              |     |               | 3,432     | 11 | [-9;45;0]     |           |     |              |           |    |               |
|                                          |              |     |               | 3,251     | a  | [-6;48;-9]    |           |     |              |           |    |               |
| <b>CEREBELLUM</b>                        |              |     |               |           |    |               |           |     |              |           |    |               |
| cerebellum middle                        | 3,851        | 16  | [6;-45;0]     |           |    |               |           |     |              |           |    |               |
| cerebellum left                          | 4,186        | 44  | [-21;-78;-15] |           |    |               |           |     |              | 3,455     | 11 | [-12;-51;-21] |
|                                          | 3,359        | a   | [-6;-90;-12]  |           |    |               |           |     |              |           |    |               |
| cerebellum right                         | 4,799        | 32  | [21;-78;-21]  |           |    |               |           |     |              |           |    |               |

**Locus coeruleus-seeded connectivity.** Main effects of drug (ANOVA-f-test) as well as results of the post-hoc tests for the contrasts AMS>PLA, REB> PLA and REB< PLA are shown in detail (all  $p < 0.001$ ,  $k=10$ ). Regions marked with 'a' are part of the previous cluster. Significant clusters for the contrast AMS<PLA were solely found in the cerebellum.

# Table S3:

| target region<br>SUBCORTICAL REGIONS     | ANOVA-f-test |    |              | AMS > PLA |    |               | AMS < PLA |    |              | REB > PLA |    |               | REB < PLA |    |               |
|------------------------------------------|--------------|----|--------------|-----------|----|---------------|-----------|----|--------------|-----------|----|---------------|-----------|----|---------------|
|                                          | z            | NV | peak         | z         | NV | peak          | z         | NV | peak         | z         | NV | peak          | z         | NV | peak          |
| medial thalamus left                     |              |    |              | 3.590     | 11 | [-6;-18;12]   |           |    |              |           |    |               |           |    |               |
| ventral thalamus                         | 3.895        | 30 | [3;-18;-6]   |           |    |               |           |    |              |           |    |               |           |    |               |
| midbrain                                 | 3.295        | a  | [9;-9;-6]    |           |    |               |           |    |              |           |    |               | 3.895     | 30 | [3;-18;-6]    |
|                                          |              |    |              |           |    |               |           |    |              |           |    |               | 3.295     | a  | [9;-9;-6]     |
| hippocampus left                         | 3.889        | 17 | [-27;-6;-33] | 4.083     | 91 | [-15;-15;-9]  |           |    |              |           |    |               | 3.889     | 17 | [-27;-6;-33]  |
| substantia nigra left                    |              |    |              | 4.252     | a  | [-6;-12;-15]  |           |    |              |           |    |               |           |    |               |
| substantia nigra right                   |              |    |              | 3.788     | a  | [6;-15;-21]   |           |    |              |           |    |               |           |    |               |
| <b>CORTICAL REGIONS</b>                  |              |    |              |           |    |               |           |    |              |           |    |               |           |    |               |
| pregenual anterior cingulate cortex left | 4.279        | 11 | [-6;30;9]    |           |    |               |           |    |              |           |    |               | 4.279     | 11 | [-6;30;9]     |
| dorsal anterior cingulate cortex         |              |    |              | 3.681     | 43 | [0;30;33]     |           |    |              |           |    |               |           |    |               |
|                                          |              |    |              | 3.571     | a  | [18;27;33]    |           |    |              |           |    |               |           |    |               |
| anterior insula cortex right             | 3.976        | 62 | [36;27;6]    |           |    |               |           |    |              |           |    |               | 3.976     | 62 | [36;27;6]     |
|                                          |              |    |              |           |    |               |           |    |              |           |    |               | 3.605     | a  | [27;33;-3]    |
|                                          |              |    |              |           |    |               |           |    |              |           |    |               | 3.410     | a  | [45;9;3]      |
| medial insula cortex left                | 3.819        | 11 | [-33;3;-9]   |           |    |               |           |    |              |           |    |               | 3.819     | 11 | [-33;3;-9]    |
| lateral temporal cortex left             | 4.202        | 25 | [-45;-33;-9] |           |    |               |           |    |              |           |    |               | 4.202     | 25 | [-45;-33;-9]  |
|                                          |              |    |              |           |    |               |           |    |              |           |    |               | 3.420     | a  | [-57;-27;-9]  |
| parahippocampal gyrus left               |              |    |              | 3.621     | 11 | [-6;-36;-3]   |           |    |              | 3.820     | 29 | [-6;-39;3]    |           |    |               |
| parahippocampal gyrus right              |              |    |              |           |    |               | 3.592     | 10 | [30;-30;-15] | 3.827     | a  | [9;-36;0]     |           |    |               |
| medial occipital cortex                  |              |    |              |           |    |               |           |    |              | 4.317     | 60 | [3;-78;-9]    |           |    |               |
| lateral occipital cortex left            |              |    |              |           |    |               | 3.973     | 61 | [-48;-81;6]  |           |    |               |           |    |               |
| lateral occipital cortex right           |              |    |              |           |    |               | 3.458     | 22 | [48;-60;-3]  |           |    |               |           |    |               |
| <b>CEREBELLUM</b>                        |              |    |              |           |    |               |           |    |              |           |    |               |           |    |               |
| cerebellum left                          | 4.129        | 30 |              |           |    | [-15;-54;-42] |           |    |              | 4.154     | 47 | [-15;-84;-21] | 4.129     | 30 | [-15;-54;-42] |
|                                          | 3.736        | a  |              |           |    | [-27;-48;-42] |           |    |              | 3.636     | a  | [-12;-72;-15] | 3.736     | a  | [-27;-48;-42] |
|                                          |              |    |              |           |    |               |           |    |              | 3.920     | 17 | [-42;-57;-30] |           |    |               |
| cerebellum right                         | 3.976        | 62 | [36;27;6]    |           |    |               |           |    |              | 3.768     | 24 | [36;-66;-21]  |           |    |               |
|                                          | 3.605        | a  | [27;33;-3]   |           |    |               |           |    |              | 3.614     | a  | [30;-60;-21]  |           |    |               |
|                                          | 3.410        | a  | [45;9;3]     |           |    |               |           |    |              |           |    |               |           |    |               |

**Amygdala-seeded connectivity.** Main effects of drug (ANOVA-f-test) as well as results of the post-hoc tests for the contrasts AMS>PLA, AMS<PLA, REB> PLA and REB< PLA are shown in detail (all p<0.001, k=10). Regions marked with ‘a’ are part of the previous cluster.

**Table S4:**

| target region                 | ANOVA-f-test |    |               | AMS > PLA |     |               | REB > PLA |     |              | REB < PLA |    |               |
|-------------------------------|--------------|----|---------------|-----------|-----|---------------|-----------|-----|--------------|-----------|----|---------------|
|                               | z            | NV | peak          | z         | NV  | peak          | z         | NV  | peak         | z         | NV | peak          |
| <b>SUBCORTICAL REGIONS</b>    |              |    |               |           |     |               |           |     |              |           |    |               |
| putamen left                  | 5,596        | 86 | [-30;-6;9]    | 3,795     | 38  | [-36;-6;0]    |           |     |              | 4,588     | 15 | [-30;-6;9]    |
|                               | 4,353        | a  | [-36;-6;-3]   |           |     |               |           |     |              |           |    |               |
| putamen right                 | 4,572        | 80 | [33;0;-6]     | 4,468     | 136 | [33;0;-6]     |           |     |              |           |    |               |
|                               |              |    |               | 3,590     | a   | [27;0;12]     |           |     |              |           |    |               |
|                               |              |    |               | 3,520     | a   | [30;0;-18]    |           |     |              |           |    |               |
| hippocampus left              | 3,891        | 10 | [-36;-12;-27] | 4,131     | 32  | [-33;-12;-27] |           |     |              |           |    |               |
| hippocampus right             |              |    |               | 4,667     | 13  | [33;-18;-18]  |           |     |              |           |    |               |
|                               |              |    |               | 3,524     | a   | [-33;-24;-18] |           |     |              |           |    |               |
| amygdala left                 |              |    |               | 3,454     | 20  | [-24;9;-21]   |           |     |              |           |    |               |
| <b>CORTICAL</b>               |              |    |               |           |     |               |           |     |              |           |    |               |
| orbitofrontal cortex right    | 3,647        | 10 | [33;48;-12]   |           |     |               |           |     |              | 4,038     | 47 | [33;48;-9]    |
| anterior insula cortex right  | 3,504        | 11 | [42;15;-21]   |           |     |               |           |     |              |           |    |               |
| posterior insula cortex right |              |    |               |           |     |               | 3,649     | 18  | [45;-15;-6]  |           |    |               |
| parahippocampal gyrus left    | 4,644        | 90 | [-21;-39;0]   |           |     |               | 5,105     | 113 | [-21;-39;0]  |           |    |               |
|                               | 4,060        | a  | [-6;-42;3]    |           |     |               | 3,798     | a   | [-21;-51;24] |           |    |               |
|                               | 3,892        | a  | [6;-45;0]     |           |     |               | 3,371     | a   | [-3;-42;3]   |           |    |               |
| parahippocampal gyrus right   |              |    |               |           |     |               | 3,988     | 28  | [33;-39;-3]  |           |    |               |
| inferior temporal cortex left |              |    |               |           |     |               |           |     |              | 3,770     | 17 | [-54;-33;-24] |
| <b>CEREBELLUM</b>             |              |    |               |           |     |               |           |     |              |           |    |               |
| cerebellum right              | 4,137        | 31 | [9;-84;-18]   |           |     |               |           |     |              |           |    |               |

**Substantia nigra-seeded connectivity.** Main effects of drug (ANOVA-f-test) as well as results of the post-hoc tests for the contrasts AMS>PLA, REB> PLA and REB< PLA are shown in detail (all p<0.001, k=10). Regions marked with ‘a’ are part of the previous cluster. No significant clusters were found for the contrast AMS<PLA.

**Table S5:**

| target region                             | ANOVA-f-test |     |             | AMS > PLA |    | AMS < PLA     |       |    | REB > PLA    |       |     | REB < PLA   |   |       |      |               |
|-------------------------------------------|--------------|-----|-------------|-----------|----|---------------|-------|----|--------------|-------|-----|-------------|---|-------|------|---------------|
|                                           | z            | NV  | peak        | z         | NV | peak          | z     | NV | peak         | z     | NV  | peak        | z | NV    | peak |               |
| <b>SUBCORTICAL REGIONS</b>                |              |     |             |           |    |               |       |    |              |       |     |             |   |       |      |               |
| thalamic pulvinar right                   | 5,651        | 179 | [18;-18;18] |           |    |               |       |    |              | 5,540 | 244 | [18;-18;18] |   |       |      |               |
|                                           |              |     |             |           |    |               |       |    |              | 4,852 | a   | [9;-15;12]  |   |       |      |               |
| thalamic pulvinar left                    | 4,714        | a   | [-6;-18;12] |           |    |               |       |    |              | 5,180 | a   | [-6;-18;12] |   |       |      |               |
| <b>CORTICAL</b>                           |              |     |             |           |    |               |       |    |              |       |     |             |   |       |      |               |
| pregenual anterior cingulate cortex left  | 4,910        | 68  | [-12;42;-6] |           |    |               | 4,311 | 78 | [-12;42;-6]  |       |     |             |   | 5,101 | 81   | [-12;42;-6]   |
|                                           |              |     |             |           |    |               |       |    |              |       |     |             |   | 4,021 | a    | [-12;33;0]    |
| subgenual anterior cingulate cortex left  | 4,072        | a   | [-9;21;-6]  |           |    |               | 4,553 | a  | [-9;21;-6]   |       |     |             |   | 3,964 | a    | [-12;30;-12]  |
|                                           | 3,611        | a   | [-12;33;0]  |           |    |               | 4,065 | a  | [-12;33;-9]  |       |     |             |   |       |      |               |
| subgenual anterior cingulate cortex right | 4,400        | 44  | [9;30;-9]   |           |    |               | 4,557 | 54 | [9;30;-9]    |       |     |             |   | 4,024 | 49   | [9;30;-9]     |
| pregenual anterior cingulate cortex right | 3,405        | a   | [15;39;0]   |           |    |               |       |    |              |       |     |             |   | 3,769 | a    | [15;39;0]     |
| posterior cingulate cortex right          |              |     |             | 4,309     | 23 | [9;-42;21]    |       |    |              | 3,563 | 22  | [6;-39;9]   |   |       |      |               |
|                                           |              |     |             | 3,873     | 14 | [6;-27;30]    |       |    |              | 3,418 | a   | [-6;-39;6]  |   |       |      |               |
|                                           |              |     |             |           |    |               |       |    |              | 3,152 | a   | [-15;-36;3] |   |       |      |               |
| posterior insula right                    | 3,488        | 11  | [39;-21;18] | 3,950     | 37 | [39;-21;18]   |       |    |              | 3,653 | 24  | [39;-24;6]  |   |       |      |               |
| posterior insula left                     |              |     |             | 3,651     | 59 | [-39;-27;21]  |       |    |              |       |     |             |   |       |      |               |
|                                           |              |     |             | 3,621     | a  | [-33;-27;6]   |       |    |              |       |     |             |   |       |      |               |
|                                           |              |     |             | 3,474     | a  | [-30;-27;24]  |       |    |              |       |     |             |   |       |      |               |
| fusiform gyrus left                       |              |     |             | 3,793     | 10 | [-30;-57;-18] |       |    |              |       |     |             |   |       |      |               |
| secondary visual cortex left              | 3,974        | 22  | [-21;-93;6] | 4,061     | 35 | [-18;-96;3]   |       |    |              | 3,932 | 21  | [-21;-93;6] |   |       |      |               |
|                                           |              |     |             | 3,845     | a  | [-27;-87;15]  |       |    |              |       |     |             |   |       |      |               |
| lateral occipital cortex left             |              |     |             |           |    |               | 3,870 | 14 | [-51;-81;15] |       |     |             |   | 4,370 | 22   | [-51;-81;12]  |
| superior temporal gyrus left              |              |     |             |           |    |               |       |    |              |       |     |             |   | 3,806 | 48   | [-45;-57;15]  |
|                                           |              |     |             |           |    |               |       |    |              |       |     |             |   | 3,630 | a    | [-57;-48;9]   |
| medial temporal gyrus left                |              |     |             |           |    |               |       |    |              |       |     |             |   | 3,494 | a    | [-54;-39;9]   |
| medial temporal gyrus right               |              |     |             |           |    |               |       |    |              |       |     |             |   | 3,699 | 10   | [-57;-27;-12] |
|                                           |              |     |             |           |    |               |       |    |              |       |     |             |   | 3,637 | 22   | [54;-57;-3]   |

**Nucleus accumbens-seeded connectivity.** Main effects of drug (ANOVA-f-test) as well as results of the post-hoc tests for the contrasts AMS>PLA, REB> PLA and REB< PLA are shown in detail (all p<0.001, k=10). Regions marked with ‘a’ are part of the previous cluster.
